# Supplementary material for: Echocardiographic Screening for Rheumatic Heart Disease in Indigenous Australian Children: A Cost–Utility Analysis
Source: PubMed Central journal article supplement — J Am Heart Assoc. 2017 Mar 2;6(3):e004515. doi: 10.1161/JAHA.116.004515 (PMC5524001; doi:10.1161/jaha.116.004515), 2017-03-02
Supplement: JAH3-6-e004515-s001.pdf [file JAH3-6-e004515-s001.pdf]

# **SUPPLEMENTAL MATERIAL**

**Table S1: Cost (AU\$, 2013) of outpatient diagnosis of RHD**

| Item                                     | Cost (min-max)           | Source       |
|------------------------------------------|--------------------------|--------------|
| Full Blood Examination                   | 14                       | MBS, 2013    |
| C Reactive Protein                       | 15                       | MBS, 2013    |
| Erythrocyte Sedimentation Rate           | 14                       | MBS, 2013    |
| Streptococcal serology                   | 13                       | MBS, 2013    |
| Throat swab- culture                     | 19                       | MBS, 2013    |
| Blood culture                            | 26                       | MBS, 2013    |
| Xray-joint/chest                         | 40                       | MBS, 2013    |
| ECG                                      | 27                       | MBS, 2013    |
| Echocardiogram                           | 196                      | MBS, 2013    |
| Paediatric cardiologist consult          | 64                       | MBS, 2013    |
| Return travel to cardiology appointment* | 1,000 (0-4,072)          | RDH, 2011/12 |
| <b>Total cost (per episode)</b>          | <b>1,428 (428-4,564)</b> |              |

RHD- rheumatic heart disease; MBS-Medicare Benefits Schedule (available at <http://www.mbsonline.gov.au/internet/mbsonline/publishing.nsf/Content/Home>)

\*Includes travel for patient and escort.

**Table S2: Cost (AU\$, 2013) of ARF/RHD admission to Royal Darwin Hospital (RDH)**

| Item                                             | Cost (min-max)               | Source                |
|--------------------------------------------------|------------------------------|-----------------------|
| Inpatient admission with average length of stay* | 7,057 (4,247-25,786)         | NHCDC (2012/13) (RDH) |
| Return travel to RDH                             | 2,036                        | NHCDC (2011/12) (RDH) |
| Boarder costs (travel + accommodation)           | 2,378                        | NHCDC (2011/12) (RDH) |
| <b>Total cost (per episode)</b>                  | <b>11,471 (8,661-30.200)</b> |                       |

ARF- acute rheumatic fever; RHD- rheumatic heart disease; NHCDC,-National Hospital Cost Data Collection; RDH- Royal Darwin Hospital. \*Inpatient cost based on a weighted average of the following Diagnosis Related Groups: F69A, F69B, F75A, F75B, F75C, I66A and I66B. Weights were based on the frequency of ARF/RHD admissions to RDH of 5-14 year olds, between 2008 and 2013. Costs per DRG were obtained from the Royal Darwin Hospital pricing data submitted to the NHCDC.

**Table S3: Cost (AU\$, 2013) of cardiac valve surgery including transfer from the Royal Darwin Hospital (RDH) to the Royal Children’s Hospital (RCH) in Melbourne, Victoria, where surgery is performed**

| Item                                                | Cost (min-max)                  | Source                 |
|-----------------------------------------------------|---------------------------------|------------------------|
| Inpatient admission                                 |                                 |                        |
| Dental procedure pre-surgery (RDH)*                 | 3,431                           | NHCDC (2012/13) (RDH)  |
| Medical stabilisation pre-surgery (RDH)**           | 25,246 (0-25,246)               | NHCDC (2012/13) (RDH)  |
| Cardiac surgery (RCH)                               | 64,000 (35,000-102,000)         | RCH, 2014 <sup>#</sup> |
| Return travel to RDH (2 people)                     | 4,072                           | NHCDC (2011/12) (RDH)  |
| Return travel to RCH (2 people)                     | 4,000                           | Patient Travel, RDH    |
| <b>Total cost (per episode)<sup>^</sup></b>         | <b>88,126 (46,503-138,749)</b>  |                        |
| <b>Average lifetime cost of surgery<sup>~</sup></b> | <b>124,495 (65,695-196,010)</b> |                        |

NHCDC,-National Hospital Cost Data Collection; DRG-Diagnosis Related Group.

\*DRG D40Z. \*\*DRG F69A. <sup>#</sup>Costs provided by the RCH, Victoria, from a sample of NT RHD patients aged 5-14 during the year 2014 (n=6) who had RHD surgery with a mean cost of \$64,000 each (range \$35,000 - \$102,000.)

<sup>^</sup>Total cost reflects an estimated 50% probability of admission for medical stabilisation at some point prior to surgery (max cost reflects all cases are admitted for medical stabilisation prior to surgery). If a patient has heart failure and requires surgery, only the date of first surgery is simulated but the cost is multiplied by the probability of requiring future surgeries and discounted to reflect the delayed cost. <sup>~</sup>Average lifetime cost represents the possibility of multiple surgeries and was derived from the observed data where 63 children aged 5 to 15 years had 89 surgeries (RHD register 1999-2012).

**Table S4: Cost (AU\$ 2013) of outpatient RHD care – annual cost per patient, depending on RHD severity**

| Item                                             | Unit cost<br>(min-max) | Source             | Annual frequency (min-max) of cost, by RHD severity* |                               |                               |                                |
|--------------------------------------------------|------------------------|--------------------|------------------------------------------------------|-------------------------------|-------------------------------|--------------------------------|
|                                                  |                        |                    | Inactive                                             | Mild                          | Mod                           | Severe                         |
| GP consult<br>(in community)                     | 70<br>(36-103)         | MBS 2013           | 1                                                    | 1                             | 2                             | 4                              |
| Paediatrician consult<br>(in community)          | 64<br>(64-128)         | MBS 2013           |                                                      | 1                             | 1                             | 2                              |
| Dental consult<br>(in community)                 | 128                    | PHIAC<br>2013      | 1                                                    | 2 (1-2)                       | 2 (1-2)                       | 2 (2-2)                        |
| Cardiology consult<br>(in hospital)              | 64                     | MBS 2013           |                                                      | 0.5 (0.5-1)                   | 1 (1-2)                       | 2 (2-4)                        |
| Echocardiogram<br>(in hospital)                  | 196                    | MBS 2013           |                                                      | 0.5                           | 1                             | 2 (2-4)                        |
| Return travel for<br>cardiology consult**        | 1000<br>(0-2036)       | RDH<br>2011-12     |                                                      | 0.5 (0-1)                     | 1 (0-2)                       | 2 (1-4)                        |
| BPG Prophylaxis                                  | 29                     | MBS 2013           |                                                      | 13                            | 13                            | 13 (13-17)                     |
| Prophylaxis nurse                                | 50                     | NTPS EA<br>2011-14 |                                                      | 13                            | 13                            | 13 (13-17)                     |
| ARF recurrence<br>admission***                   | 11,471                 | Table A1           |                                                      | 0.045<br>(0.025-0.045)        | 0.045<br>(0.025-0.045)        | 0.045<br>(0.025-0.045)         |
| <b>Total cost per patient per year (min-max)</b> |                        |                    | <b>198<br/>(164-231)</b>                             | <b>2567<br/>(1,676-4,233)</b> | <b>3267<br/>(1,843-6,534)</b> | <b>4732<br/>(3,368-13,809)</b> |

RHD- rheumatic heart disease; GP-general practitioner; MBS-Medicare Benefits Schedule; PHIAC, Private Health Insurance Administration Council; RDH-Royal Darwin Hospital Patient Travel; BPG, Benzathine penicillin G; NTPS EA- Northern Territory Public Sector Enterprise Agreement; ARF acute rheumatic fever. \*As recommended by the Australian guidelines. \*\*Includes travel for patient and escort. \*\*\*Annual probability of ARF recurrence =4.5% (min 2.5%); sourced from Lawrence et al<sup>1</sup>

**Table S5: Estimated annual cost of portable echocardiographic screening for RHD**

| Item                                         | Unit cost (AU\$) | Echo A<br>(screen 2000 children/year in 80 sites) |                                   | Echo B<br>(screen 4000 children/year in 40 sites) |                                  | Source                   |
|----------------------------------------------|------------------|---------------------------------------------------|-----------------------------------|---------------------------------------------------|----------------------------------|--------------------------|
|                                              |                  | Freq.                                             | Total cost (min-max)              | Freq.                                             | Total cost (min-max)             |                          |
| <b>Fixed costs</b>                           |                  |                                                   |                                   |                                                   |                                  |                          |
| Equipment (lasts 5 years)                    |                  |                                                   |                                   |                                                   |                                  |                          |
| Vivid I portable echo machine*               | 90,000           | 2                                                 | 180,000                           | 2                                                 | 180,000                          | GE sales, 2013           |
| Patient bed                                  | 360              | 2                                                 | 720                               | 2                                                 | 720                              | Primemed.com.au, 2013    |
| Laptop (mid-range)                           | 1,000            | 2                                                 | 2,000                             | 2                                                 | 2,000                            | Officeworks.com.au, 2013 |
| Sub-total (5 years)                          |                  |                                                   | 182,720                           |                                                   | 182,720                          |                          |
| <b>Sub-total (annual)**</b>                  |                  |                                                   | <b>37,045</b>                     |                                                   | <b>37,045</b>                    |                          |
| Consumables (annual)                         |                  |                                                   |                                   |                                                   |                                  |                          |
| Gel, ECG dots, tissues                       | -                | -                                                 | 500                               | -                                                 | 500                              | Estimated                |
| Administration, phones, stationary           | -                | -                                                 | 5,000                             | -                                                 | 5,000                            | Estimated                |
| <b>Sub-total</b>                             |                  |                                                   | <b>5,500 (4,500-6,500)</b>        |                                                   | <b>5,500 (4,500-6,500)</b>       |                          |
| Staff (annual FTE)                           |                  |                                                   |                                   |                                                   |                                  |                          |
| Echo technician                              | 117,000          | 1                                                 | 117,000 (100,100-130,000)         | 1                                                 | 117,000 (100,100-130,000)        | NTPS award               |
| Program coordinator (nurse)                  | 117,000          | 1                                                 | 117,000 (91,000-117,000)          | 1                                                 | 117,000 (91,000-117,000)         | NTPS award               |
| Cardiologist                                 | 250,000          | 0.1                                               | 25,000 (25,000-50,000)            | 0.1                                               | 25,000 (25,000-50,000)           | NTPS award               |
| <b>Sub-total</b>                             |                  |                                                   | <b>259,000 (216,100-297,000)</b>  |                                                   | <b>259,000 (216,100-297,000)</b> |                          |
| Travel (annual- for 2 staff)                 |                  |                                                   |                                   |                                                   |                                  |                          |
| Commercial plane (2 people, return)          | 1,500            | 10                                                | 15,000                            | 10                                                | 15,000                           | SONT                     |
| Charter plane –day trip                      | 5,000            | 10                                                | 50,000                            | 5x2                                               | 50,000                           | SONT                     |
| Charter plane –overnight trip                | 8,000            | 10                                                | 80,000                            | -                                                 | -                                | SONT                     |
| Four-wheel drive (per week)                  | 470              | 50                                                | 23,500                            | 25                                                | 11,750                           | SONT                     |
| Fuel (per round trip)***                     | 105              | 50                                                | 5,250                             | 25                                                | 2,625                            | Average pump price, 2013 |
| Accommodation (2 people per night)           | 300              | 50x2                                              | 30,000                            | 40x3                                              | 36,000                           | SONT                     |
| Travel allowance (2 people per night)        | 175              | 50x2                                              | 17,520                            | 40x3                                              | 21,024                           | NTPS award               |
| <b>Sub-total</b>                             |                  |                                                   | <b>221,270 (156,524-270,782)#</b> |                                                   | <b>136,399 (89,274-206,115)^</b> |                          |
| <b>Total fixed (annual)</b>                  |                  |                                                   | <b>522,815 (414,169-611,327)</b>  |                                                   | <b>437,944 (346,919-546,660)</b> |                          |
| <b>Variable costs</b>                        |                  |                                                   |                                   |                                                   |                                  |                          |
| Positive screen (follow-up)                  |                  |                                                   |                                   |                                                   |                                  |                          |
| Diagnostic echocardiogram                    | 196              | 1                                                 | 196                               | 1                                                 | 196                              | MBS, 2013                |
| Cardiology consult                           | 64               | 1                                                 | 64 (64-128)                       | 1                                                 | 64 (64-128)                      | MBS, 2013                |
| Travel (patient + escort)                    | 1000             | 1                                                 | 1,000 (0-2,000)                   | 1                                                 | 1,000 (0-2,000)                  | Patient Travel, RDH      |
| <b>Sub-total (per child)</b>                 |                  |                                                   | <b>1,260 (260-2,324)</b>          |                                                   | <b>1,260 (260-2,324)</b>         |                          |
| <b>Total variable (2.5% positive cases)</b>  |                  | n=50                                              | <b>63,000 (13,015-116,220)</b>    | n=100                                             | <b>126,000 (26,030-232,440)</b>  |                          |
| <b>Total screening costs (\$AU per year)</b> |                  |                                                   | <b>585,815 (427,184-727,547)</b>  |                                                   | <b>563,944 (422,949-779,100)</b> |                          |

*RHD- rheumatic heart disease; FTE- full-time equivalent. NTPS - Northern Territory Public Sector; SONT - Specialist Outreach Northern Territory; MBS- Medicare Benefits Schedule; RDH- Royal Darwin Hospital.*

*\*Cost includes service and insurance over the recommended 5-year life span.*

*\*\*Annuity in advance over five years calculated as the upfront cost minus discounted re-sale price of 10% purchase price (\$168,403).*

*\*\*\*Based on pump price of \$1.40 per litre and fuel efficiency of 10L/100km, average travel distance 750km round trip.*

*#Minimum cost based on 10 commercial plane trips (day trip) + 10 charter plane trips (day trip) + 60 road trips (four-wheel drive hire and fuel, accommodation and travel allowance);*

*maximum cost based on 10 commercial plane trips (overnight trip including accommodation and travel allowance) + 20 charter plane trips (overnight trip including accommodation and travel allowance) + 50 road trips (four-wheel drive hire and fuel, accommodation and travel allowance).*

*^Minimum cost based on 10 commercial plane trips (overnight trip including accommodation and travel allowance) + 30 road trips (four-wheel drive hire and fuel, accommodation and travel allowance);*

*maximum cost based on 5 commercial plane trips (overnight trip including accommodation and travel allowance) + 10 charter plane trips (overnight trip including accommodation and travel) + 25 road trips (four-wheel drive hire and fuel, accommodation and travel allowance)*

**Figure S1: Number and severity of RHD cases diagnosed between 1999 and 2012 in Indigenous children of the Northern Territory, Australia (n=387\*)**

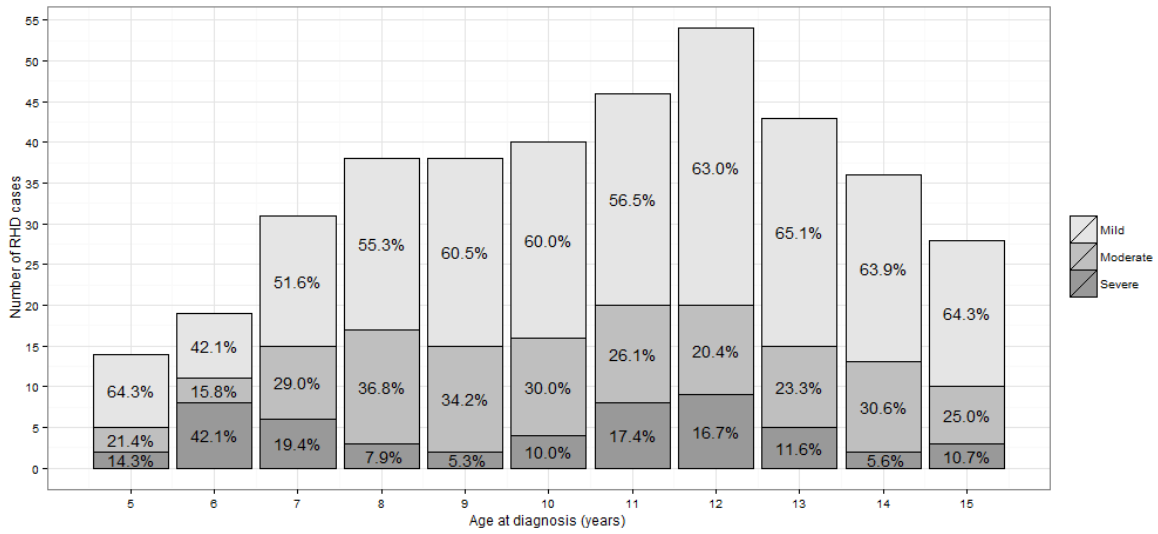

*\*Average annual incidence of RHD: 27.6 new cases per year in children aged 5-15 years.*

**Figure S2: One-way sensitivity analysis of Echo B, Scenarios 1, 2 and 3**

**Scenario 1**

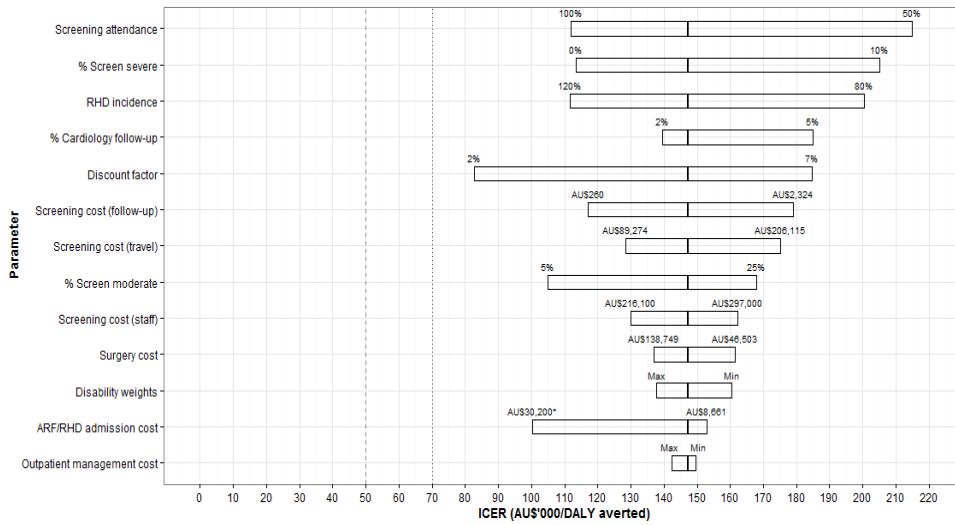

**Scenario 2**

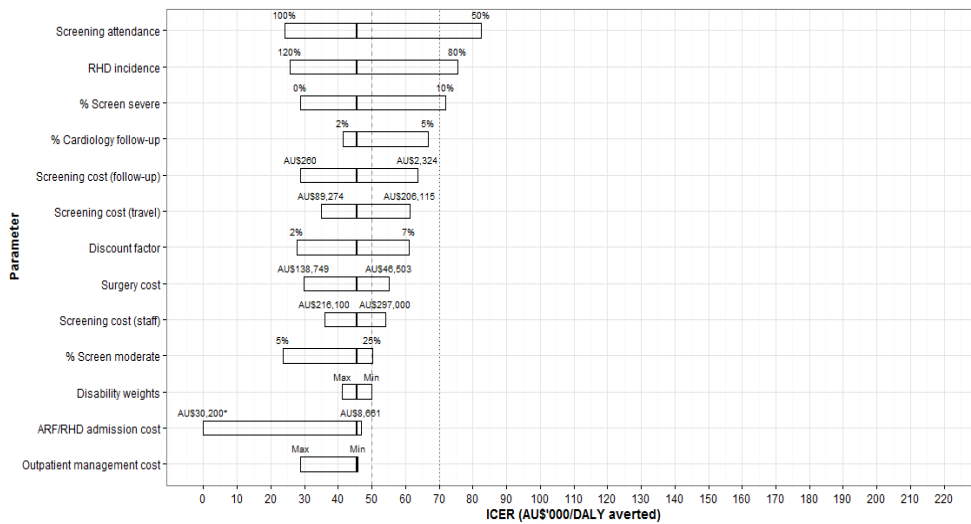

**Scenario 3**

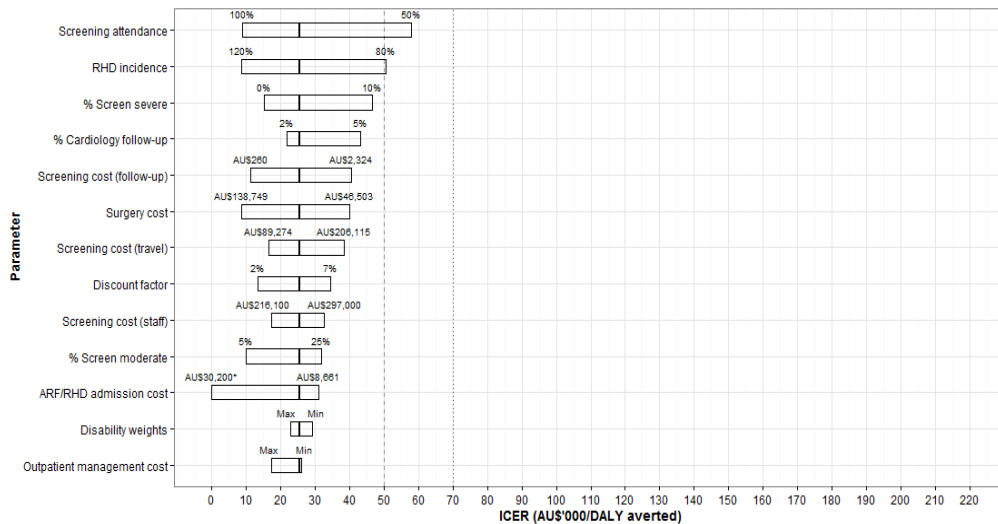



**Supplemental Reference:**

1. Lawrence JG, Carapetis JR, Griffiths K, Edwards K, Condon JR. Acute rheumatic fever and rheumatic heart disease: incidence and progression in the Northern Territory of Australia, 1997 to 2010. *Circulation*. 2013;128:492-501.
